# Supplementary material for: Exosome complex orchestrates developmental signaling to balance proliferation and differentiation during erythropoiesis
Source: eLife. 2016 Aug 20;5:e17877. doi: 10.7554/eLife.17877 (PMC5040589; doi:10.7554/eLife.17877)
Supplement: Figure 1—source data 1. — Sheet 1: Figure 1B mRNA expression of Exosc8 and Exosc9 normalized to 18S. Sheet 2: Figure 1C densitometric analysis of Exosc2 immunoblots (pull down/input) from an Exosc3 immunoprecipitation 48 hr after Exosc8 or Exosc9 knockdown. DOI: http://dx.doi.org/10.7554/eLife.17877.004 [file elife-17877-fig1-data1.xlsx]

## Sheet: Figure 1B
	Exosc8 normalized to 18S	Exosc9 normalized to 18S
IP luc	1.52908	1.33421
IP exo8	0.157757	1.00106
IP exo9	1.16803	0.164148
IP luc	2.20318	2.05827
IP exo8	0.439062	1.45425
IP exo9	1.23337	0.134596
IP luc	3.08775	2.74971
IP exo8	0.791092	2.00351
IP exo9	1.74593	0.296379
IP luc	1.80419	1.5322
IP exo8	0.495198	1.43703
IP exo9	1.88311	0.730054
Avg	Exosc8	Exosc8 se	Exosc9	exosc9 se
IP luc	2.87473	0.679995	2.55813	0.632736
IP exo8	0.627703	0.259606	1.96528	0.410611
IP exo9	2.01015	0.359774	0.441726	0.274989
To 1	Exosc8	Exosc8 se	Exosc9	exosc9 se
IP luc	1	0.236542	1	0.247343
IP exo8	0.218352	0.0903061	0.768251	0.160512
IP exo9	0.699248	0.125151	0.172675	0.107496

## Sheet: Figure 1C
soecific/input	rep1	rep2	rep3	rep4	rep5	avg	se
Luc Igg	0.0498705	0.0658411	0.254115	0.0855049	0.13207	0.11748	0.0311345
Luc	1.20527	1.15234	1.21545	0.872206	0.767742	1.0426	0.0785952
Exo8 Igg	0.135154	0.0603744	0.0968307	0.0805593	0.112169	0.0970175	0.0108522
Exo8	0.890379	0.336004	0.191479	0.16658	0.584144	0.433717	0.115071
Exo9 Igg	0.0758863	0.0610284	0.0594102			0.0654416	0.00343247
Exo9	0.122092	0.141007	0.129589			0.130896	0.00360004
