# Supplementary material for: Exosome complex orchestrates developmental signaling to balance proliferation and differentiation during erythropoiesis
Source: eLife. 2016 Aug 20;5:e17877. doi: 10.7554/eLife.17877 (PMC5040589; doi:10.7554/eLife.17877)
Supplement: Figure 2—source data 1. — Sheet 1: Figure 2B percentage of cells from each biological replicate found in the live, early apoptotic, late apoptotic and necrotic flow cytometry gates in control and Exosc8 knockdown cells after 48 hr culture under Epo-limiting conditions. DOI: http://dx.doi.org/10.7554/eLife.17877.007 [file elife-17877-fig2-data1.xlsx]

## Sheet: Figure 2B
		early apop	necrotic	late apoptosis	live
0 Epo	luc	5	3.3	22.4	69.3
		5.08	4.12	22.8	68
		6.51	3.46	26.4	63.6
		6.85	5.34	24.1	63.7
	Avg	5.86	4.055	23.925	66.15
	se	0.478766	0.463636	0.901272	1.46771
0 Epo	Exo8	4.19	4.5	71.6	19.7
		4.92	4.44	68.5	22.1
		4.26	5.05	68.1	22.6
		6.45	4.56	58.3	30.7
	Avg	4.955	4.6375	66.625	23.775
	se	0.524762	0.139665	2.8831	2.39352
0.001U Epo	luc	4.55	3.89	26	65.5
		5.2	3.98	25.3	65.5
		6.74	3.49	23.8	65.9
		7.93	5.52	25.7	60.9
	Avg	6.105	4.22	25.2	64.45
	se	0.762173	0.446225	0.488194	1.18708
0.001U Epo	Exo8	4.55	4.33	63	28.2
		4.38	4.16	61.5	29.9
		7.1	3.78	47.1	42
		5.2	3.98	38.8	52.1
	Avg	5.3075	4.0625	52.6	38.05
	se	0.623075	0.118207	5.83138	5.60097
0.005U Epo	luc	4.21	3.23	22.5	70.1
		3.55	4.64	20.4	71.4
		5	3.56	20.9	70.6
		5.82	5.91	21.5	66.7
	Avg	4.645	4.335	21.325	69.7
	se	0.491164	0.605207	0.451617	1.03521
0.005U Epo	Exo8	4.02	3.42	42	50.5
		3.37	3.51	34.3	58.9
		4.6	3.53	29.1	62.8
		3.01	3.69	21.6	71.7
	Avg	3.75	3.5375	31.75	60.975
	se	0.352065	0.0561805	4.29738	4.40064
0.05U Epo	luc	2.04	3.06	14	80.9
		1.88	6	13.2	78.9
		2.95	3.85	15.1	78.1
		2.65	7.39	12.1	77.9
	Avg	2.38	5.075	13.6	78.95
	se	0.252223	0.99061	0.633772	0.684957
0.05U Epo	Exo8	2.09	2.55	20	75.3
		1.72	2.86	17	78.4
		2.38	3.1	14.5	80
		1.72	3.31	13.3	81.7
	avg	1.9775	2.955	16.2	78.85
	se	0.16002	0.163325	1.48268	1.36168
0.5U Epo	luc	1.31	3.08	10.8	84.9
		1.44	6.57	11.1	80.9
		2.7	4.03	12.8	80.5
		2.44	9.9	11.8	75.9
	Avg	1.9725	5.895	11.625	80.55
	se	0.350033	1.52474	0.444175	1.84097
0.5U Epo	Exo8	1.66	2.83	12.7	82.8
		2.36	2.28	15.4	80
		2.99	2.8	12.6	81.6
		1.92	4.45	11.2	82.5
	Avg	2.2325	3.09	12.975	81.725
	se	0.2909	0.470585	0.877852	0.628987
Avgs		early apop	necrotic	late apoptosis	live
0 EPO	Luc	5.86	4.055	23.925	66.15
	Exo8	4.955	4.6375	66.625	23.775
0.001U Epo	Luc	6.105	4.22	25.2	64.45
	Exo8	5.3075	4.0625	52.6	38.05
0.005U Epo	Luc	4.645	4.335	21.325	69.7
	Exo8	3.75	3.5375	31.75	60.975
0.05U Epo	Luc	2.38	5.075	13.6	78.95
	Exo8	1.9775	2.955	16.2	78.85
0.5U Epo	Luc	1.9725	5.895	11.625	80.55
	Exo8	2.2325	3.09	12.975	81.725
se		early apop	necrotic	late apoptosis	live
0 EPO	Luc	0.478766	0.463636	0.901272	1.46771
	Exo8	0.524762	0.139665	2.8831	2.39352
0.001U Epo	Luc	0.762173	0.446225	0.488194	1.18708
	Exo8	0.623075	0.118207	5.83138	5.60097
0.005U Epo	Luc	0.491164	0.605207	0.451617	1.03521
	Exo8	0.352065	0.0561805	4.29738	4.40064
0.05U Epo	Luc	0.252223	0.99061	0.633772	0.684957
	Exo8	0.16002	0.163325	1.48268	1.36168
0.5U Epo	Luc	0.350033	1.52474	0.444175	1.84097
	Exo8	0.2909	0.470585	0.877852	0.628987
