# Supplementary material for: Exosome complex orchestrates developmental signaling to balance proliferation and differentiation during erythropoiesis
Source: eLife. 2016 Aug 20;5:e17877. doi: 10.7554/eLife.17877 (PMC5040589; doi:10.7554/eLife.17877)
Supplement: Figure 3—source data 1. — Sheet 1: Figure 3B the percent live cells found in the R1, R2, R3, R4 and R5 flow cytometry gates in control and Exosc8 knockdown cells after 48 hr culture in Epo-limiting conditions. Sheet 2: Figure 3D the CFU-E and BFU-E counts from colony assays performed after 24 hr infection with shExosc8. DOI: http://dx.doi.org/10.7554/eLife.17877.009 [file elife-17877-fig3-data1.xlsx]

## Sheet: Figure 3B
		live other	live R1	live R2	liveR3	Live R4	live R5
0 Epo	luc	0.407	11.5	44.1	43.5	0.505	0.00421
		0.385	10.1	46.2	42.8	0.533	0.00106
		0.612	11.7	34.7	52.2	0.746	0.00622
		0.596	12.8	36	49.9	0.732	0.00763
	Avg	0.5	11.525	40.25	47.1	0.629	0.00478
	se	0.0603006	0.554339	2.87359	2.33274	0.0638292	0.00142476
0 Epo	Exo8	8.86	43.1	5.12	39	3.78	0.0526
		10.8	34.8	5.39	43.7	5.21	0.0495
		7.86	52.9	8.37	25.1	5.68	0.0837
		4.38	39.2	12.4	38.8	5.17	0.0506
	Avg	7.975	42.5	7.82	36.65	4.96	0.0591
	se	1.34478	3.85897	1.69494	4.013	0.41002	0.00822506
0.001U Epo	luc	0.385	12.1	48.1	39.2	0.221	0.00327
		0.329	10.9	45.5	43	0.344	0.00322
		0.432	9.68	36.1	53.5	0.298	0.00206
		0.61	13.3	34.8	50.9	0.398	0.00328
	Avg	0.439	11.495	41.125	46.65	0.31525	0.0029575
	se	0.0607632	0.778476	3.32976	3.33929	0.0374775	0.000299454
0.001U Epo	Exo8	7.11	21.2	2.88	65.1	3.67	0.0197
		6.11	18.9	2.67	68.2	4.12	0.0238
		2.78	16.1	3.84	72.8	4.46	0.0156
		2.52	14	5.38	74	4.03	0.00629
	Avg	4.63	17.55	3.6925	70.025	4.07	0.0163475
	se	1.16245	1.57718	0.61746	2.06332	0.162327	0.00374712
0.005U Epo	luc	0.33	10.2	41.3	47.8	0.337	0.0033
		0.3	9.56	46.5	43.3	0.32	0
		0.433	8.75	32.5	57.6	0.668	0.00551
		0.429	10.6	30	58.1	0.811	0.00992
	Avg	0.373	9.7775	37.575	51.7	0.534	0.0046825
	se	0.0340514	0.403947	3.83696	3.66901	0.122233	0.00208073
0.005U Epo	Exo8	2.36	9	1.88	83.9	2.89	0.011
		1.6	7.74	1.79	85.8	3.08	0.0072
		1.37	7.87	2.18	84.6	4	0.0123
		1.22	8.19	3.83	82.7	4.01	0.00231
	Avg	1.6375	8.2	2.42	84.25	3.495	0.0082025
	se	0.253192	0.282931	0.477336	0.648717	0.296999	0.00224243
0.05U Epo	luc	0.29	8.02	44.4	46.9	0.35	0.0031
		0.239	6.59	44.8	48	0.358	0.000969
		0.348	6.69	32	60.1	0.827	0.00427
		0.341	6.55	29	63.3	0.86	0.00313
	Avg	0.3045	6.9625	37.55	54.575	0.59875	0.00286725
	se	0.0253722	0.353727	4.11694	4.17121	0.141476	0.000688856
0.05U Epo	Exo8	1.08	4.2	3.85	89	1.81	0.0183
		0.767	3.92	3.22	90.1	1.95	0.00967
		0.891	3.97	2.61	89.5	3.01	0.0195
		0.969	5.71	4.04	86.5	2.79	0.0032
	avg	0.92675	4.45	3.43	88.775	2.39	0.0126675
	se	0.0658716	0.424402	0.324679	0.790965	0.299221	0.00384086
0.5U Epo	luc	0.216	6.1	44.2	49.3	0.153	0.00197
		0.229	7.47	43.5	48.5	0.315	0.00282
		0.421	8.5	33.4	57	0.701	0.0042
		0.363	7.6	27.7	63.5	0.802	0.00495
	Avg	0.30725	7.4175	37.2	54.575	0.49275	0.003485
	se	0.0504123	0.495284	4.01435	3.53869	0.154388	0.000670504
0.5U Epo	Exo8	0.767	4.77	9.26	83.5	1.75	0.00105
		1.12	5.39	12.8	79.1	1.53	0.00941
		1.19	5.84	8.27	82.6	1.95	0.0179
		1.1	4.59	9.11	83.9	1.13	0.00636
	Avg	1.04425	5.1475	9.86	82.275	1.59	0.00868
	se	0.094409	0.287471	1.00392	1.09268	0.175689	0.00352539
Avgs		live other	live R1	live R2	liveR3	Live R4	live R5
0 EPO	Luc	0.5	11.525	40.25	47.1	0.629	0.00478
	Exo8	7.975	42.5	7.82	36.65	4.96	0.0591
0.001U Epo	Luc	0.439	11.495	41.125	46.65	0.31525	0.0029575
	Exo8	4.63	17.55	3.6925	70.025	4.07	0.0163475
0.005U Epo	Luc	0.373	9.7775	37.575	51.7	0.534	0.0046825
	Exo8	1.6375	8.2	2.42	84.25	3.495	0.0082025
0.05U Epo	Luc	0.3045	6.9625	37.55	54.575	0.59875	0.00286725
	Exo8	0.92675	4.45	3.43	88.775	2.39	0.0126675
0.5U Epo	Luc	0.30725	7.4175	37.2	54.575	0.49275	0.003485
	Exo8	1.04425	5.1475	9.86	82.275	1.59	0.00868
se		live other	live R1	live R2	liveR3	Live R4	live R5
0 EPO	Luc	0.0603006	0.554339	2.87359	2.33274	0.0638292	0.00142476
	Exo8	1.34478	3.85897	1.69494	4.013	0.41002	0.00822506
0.001U Epo	Luc	0.0607632	0.778476	3.32976	3.33929	0.0374775	0.000299454
	Exo8	1.16245	1.57718	0.61746	2.06332	0.162327	0.00374712
0.005U Epo	Luc	0.0340514	0.403947	3.83696	3.66901	0.122233	0.00208073
	Exo8	0.253192	0.282931	0.477336	0.648717	0.296999	0.00224243
0.05U Epo	Luc	0.0253722	0.353727	4.11694	4.17121	0.141476	0.000688856
	Exo8	0.0658716	0.424402	0.324679	0.790965	0.299221	0.00384086
0.5U Epo	Luc	0.0504123	0.495284	4.01435	3.53869	0.154388	0.000670504
	Exo8	0.094409	0.287471	1.00392	1.09268	0.175689	0.00352539

## Sheet: Figure 3D
5000 cell/plate	CfU-E	BFU-E			CFU-E	BFU-E
luc-1	335	34		exo8-1	418	3
	517	42			494	4
luc-2	211	49		exo8-2	216	1
	259	48			260	2
luc-3	307	52		exo8-3	285	3
	238	53			285	5
luc-4	351	52		exo8-4	386	2
	243	32			481	3
luc-5	327	42		exo8-5	475	4
	298	51			374	3
luc-6	317	56		exo8-6	285	3
	323	53			349	3
avg	310.5	47		avg	359	3
se	22.6781	2.24958		se	27.2166	0.301511
per 10,000 cells	CfU-E	BFU-E			CfU-E	BFU-E
luc avg	621	94		exo8 avg	718	6
luc se	45.3562	4.49916		exo8 se	54.4332	0.603023
