# Supplementary material for: Exosome complex orchestrates developmental signaling to balance proliferation and differentiation during erythropoiesis
Source: eLife. 2016 Aug 20;5:e17877. doi: 10.7554/eLife.17877 (PMC5040589; doi:10.7554/eLife.17877)
Supplement: Figure 4—source data 1. — Sheet 1: Figure 4A and B p-Akt MFI after 10 min stimulation with either SCF or Epo 48 hr post-Exosc8 knockdown. DOI: http://dx.doi.org/10.7554/eLife.17877.012 [file elife-17877-fig4-data1.xlsx]

## Sheet: Figure 4A and 4B
	neg cd71 high pAKT MFI	neg cd71 low pAKT MFI	pos CD71 high pAKT MFI	pos CD71 low pAKT MFI
luc unstimulated	2704	703	867	403
luc unstimulated	972	435	707	333
luc unstimulated	1682	648	937	419
luc unstimulated	526	84.8	1120	248
luc unstimulated	961	133	1123	231
luc unstimulated	548	83.8	896	202
avg	1232.17	347.933	941.667	306
se	340.422	116.747	65.1755	37.7324
luc SCF	5979	1355	1153	775
luc SCF	7560	1206	1327	616
luc SCF	8396	1084	2082	808
luc SCF	5494	158	3863	357
luc SCF	6285	195	3778	472
luc SCF	7227	245	3632	406
avg	6823.5	707.167	2639.17	572.333
se	445.299	230.074	517.086	78.0216
luc EPO	4161	772	3970	873
luc EPO	1532	532	2457	479
luc EPO	2329	616	3854	500
luc EPO	1449	93.8	3825	225
luc EPO	2234	153	5775	249
luc EPO	1301	163	4265	315
avg	2167.67	388.3	4024.33	440.167
se	434.951	117.272	434.012	98.4786
exo8 unstimulated	1333	585	466	246
exo8 unstimulated	1183	521	532	284
exo8 unstimulated	1654	702	877	412
exo8 unstimulated	710	187	580	290
exo8 unstimulated	634	167	728	327
exo8 unstimulated	633	129	544	334
avg	1024.5	381.833	621.167	315.5
se	175.237	101.848	62.3273	23.2805
exo8 SCF	1791	772	572	360
exo8 SCF	1880	761	643	359
exo8 SCF	2946	1155	1017	512
exo8 SCF	730	171	536	363
exo8 SCF	758	187	642	354
exo8 SCF	1365	277	570	349
avg	1578.33	553.833	663.333	382.833
se	338.864	164.284	72.8504	25.9119
exo8 EPO	4192	547	3243	409
exo8 EPO	5373	712	3323	395
exo8 EPO	6146	723	4394	583
exo8 EPO	3714	154	1449	93.8
exo8 EPO	2306	163	2234	153
exo8 EPO	2882	130	1301	163
avg	4102.17	404.833	2657.33	299.467
se	596.267	117.293	492.648	78.2921
ages		neg cd71 high	neg cd71 low	pos CD71 high	pos CD71 low
luc	unstimulated	1232.17	347.933	941.667	306
	SCF	6823.5	707.167	2639.17	572.333
	EPO	2167.67	388.3	4024.33	440.167
Exosc8	unstimulated	1024.5	381.833	621.167	315.5
	SCF	1578.33	553.833	663.333	382.833
	EPO	4102.17	404.833	2657.33	299.467
se		neg cd71 high	neg cd71 low	pos CD71 high	pos CD71 low
luc	unstimulated	340.422	116.747	65.1755	37.7324
	SCF	445.299	230.074	517.086	78.0216
	EPO	434.951	117.272	434.012	98.4786
Exosc8	unstimulated	175.237	101.848	62.3273	23.2805
	SCF	338.864	164.284	72.8504	25.9119
	EPO	596.267	117.293	492.648	78.2921
avg to luc sample (neg cd71 low =1		neg cd71 high	neg cd71 low	pos CD71 high	pos CD71 low
luc	unstimulated	3.54139	1	2.70646	0.879479
	SCF	19.6115	2.03248	7.58527	1.64495
	EPO	6.23012	1.11602	11.5664	1.26509
Exosc8	unstimulated	2.94453	1.09743	1.7853	0.906783
	SCF	4.53631	1.59178	1.9065	1.10031
	EPO	11.7901	1.16354	7.63748	0.860701
se to luc sample (neg cd71 low =1		neg cd71 high	neg cd71 low	pos CD71 high	pos CD71 low
luc	unstimulated	0.978412	0.335544	0.187322	0.108447
	SCF	1.27984	0.661259	1.48616	0.224243
	EPO	1.2501	0.337052	1.2474	0.283039
Exosc8	unstimulated	0.50365	0.292722	0.179136	0.0669109
	SCF	0.973934	0.472172	0.20938	0.0744738
	EPO	1.71374	0.337112	1.41593	0.22502
