# Supplementary material for: Exosome complex orchestrates developmental signaling to balance proliferation and differentiation during erythropoiesis
Source: eLife. 2016 Aug 20;5:e17877. doi: 10.7554/eLife.17877 (PMC5040589; doi:10.7554/eLife.17877)
Supplement: Figure 5—source data 1. — Sheet 1: Figure 5A Kit MFI in the R1, R2, R3, R4 and R5 population 48 hr after Exosc8 knockdown. Sheet 2: Figure 5B Kit MFI in the R1, R2, R3, R4 and R5 population 48 hr post-Exosc9 knockdown. Sheet 3: Figure 5C Kit mRNA and primary transcript expression sorted R1-R3 populations 72 hr post-infection with shControl or shExosc8 normalized to 18S and densitometry analysis of Kit protein in Ter119- cells 24 hr post-knockdown. Sheet 4: Figure 5D mRNA expression of erythroid genes in sorted R1-R3 populations 72 hr post-infection with shControl or shExosc8 and densitometry analysis of GATA-1 and GATA-2 protein Ter119- cells 24 hr post-knockdown. Sheet 5: Figure 5E Expression of Exosc8, Kit and GATA-1/Exosc8-regulated cell cycle arrest genes in primary erythroid precursor cells 24 hr post-infection, normalized to 18S. Sheet 6: Figure 5F Cell cycle analysis of control and Exosc8-knockdown Ter119− cells 24 and 72 hr post-infection. Sheet 7: Figure 5G Exosc8 and Kit mRNA expression in G1E cells 48 hr post-infection with shControl or shExosc8 retrovirus, normalized to 18S. Sheet 8: Figure 5H Kit MFI in infected (GFP+) and uninfected (GFP-) populations of G1E cells 48 hr post-infection with shExosc8. DOI: http://dx.doi.org/10.7554/eLife.17877.015 [file elife-17877-fig5-data1.xlsx]

## Sheet: Figure 5A
	48 hr
	other kit MFI	R1 kit MFI	R2 kit MFI	R3 kit MFI	R4 kit MFI	R5 kit MFI
luc	242	939	1978	514	1031	1791
	252	1039	2181	600		1223
	177	620	1082	386	666	884
	132	305	1203	284	48.3	32.5
	126	392	1988	384	68.1	55.4
avg	185.8	659	1686.4	433.6	453.35	797.18
se	23.5112	126.342	337.625	62.1718	149.011	264.595
	other kit MFI	R1 kit MFI	R2 kit MFI	R3 kit MFI	R4 kit MFI	R5 kit MFI
exo8	102	261	126	229	75.2	201
	92.7	223	113	225	60.7	110
	99.2	248	123	223	60.2	146
	74.9	39.1	103	270	45.3	8.7
	66.8	36.1	110	238	47.1	27.4
avg	87.12	161.44	115	237	57.7	98.62
se	2.75459	11.1505	3.92994	1.76383	4.91878	26.4596
avgs	other kit MFI	R1 kit MFI	R2 kit MFI	R3 kit MFI	R4 kit MFI	R5 kit MFI
luc	185.8	659	1686.4	433.6	453.35	797.18
exo8	87.12	161.44	115	237	57.7	98.62
se	other kit MFI	R1 kit MFI	R2 kit MFI	R3 kit MFI	R4 kit MFI	R5 kit MFI
luc	23.5112	126.342	337.625	62.1718	149.011	264.595
exo8	2.75459	11.1505	3.92994	1.76383	4.91878	26.4596
R1 to 1	other	R1	R2	R3	R4	R5
luc	0.281942	1	2.55903	0.657967	0.687936	1.20968
exo8	0.1322	0.244977	0.174507	0.359636	0.0875569	0.149651
se	other kit MFI	R1 kit MFI	R2 kit MFI	R3 kit MFI	R4 kit MFI	R5 kit MFI
luc	0.0356771	0.191718	0.512329	0.0943426	0.226116	0.401511
exo8	0.00417996	0.0169203	0.00596349	0.00267653	0.00746401	0.0401512

## Sheet: Figure 5B
B	48 hr
	other kit MFI	R1 kit MFI	R2 kit MFI	R3 kit MFI	R4 kit MFI	R5 kit MFI
luc	132	305	1203	284	48.3	32.5
	126	392	1988	384	68.1	55.4
	130	720	1646	204	799	-10
	144	968	1323	174	512	331
	109	1169	1320	154	661	342
	105	763	1485	190	869	3.91
	181	1139	1277	174	887	67.1
	132	803	1761	210	666	-29.4
avg	132.375	782.375	1500.38	221.75	563.8	99.0637
se	8.28281	111.491	97.2361	26.9959	118.545	53.0538
exo9	92.7	210	155	255	32.3	35.5
	76.4	133	118	248	32.1	37
	71.3	489	221	116	16.6	-5
	74.6	511	234	109	15.5	11.8
	79.6	583	302	122	21.8	1.3
	70.3	493	217	106	23.2	59
	85.1	609	358	118	24.9	33.7
	87.8	490	311	120	25.2	-15.3
avg	79.725	439.75	239.5	149.25	23.95	19.75
se	2.8648	61.078	28.6113	22.4028	2.1926	8.98954
avg to 1	other	R1	R2	R3	R4	R5
luc	0.169196	1	1.91772	0.283432	0.720626	0.126619
exo9	0.101901	0.562071	0.306119	0.190765	0.0306119	0.0252436
se to 1	other	R1	R2	R3	R4	R5
luc	0.0105867	0.142503	0.124283	0.034505	0.151519	0.0678112
exo9	0.00366167	0.0780675	0.0365698	0.0286343	0.00280249	0.0114901

## Sheet: Figure 5C
RNA data					Western analysis
	ckit mRNA mormalized to 18s	ckit mRNA normalized to 18s				tub	ckit	ckit/tub
luc R1	2.04572	1.35531			luc	923551	380188	0.411659
luc R2	0.79163	0.552666			exo8	819236	55501	0.0677473
luc R3	0.0845087	0.0422441			luc	557093	381126	0.684134
exo8 R1	0.43735	0.302389			exo8	732654	13278	0.0181232
exo8 R2	0.152672	0.114775			luc	924884	326079	0.352562
exo8 R3	0.00839898	0.0100732			exo8	737747	25295	0.0342868
luc R1	1.39948	1.16227
luc R2	0.816535	0.580947				kit	se
luc R3	0.149206	0.117864			luc	0.482785	0.10211
exo8 R1	0.267657	0.201571			exo8	0.0400524	0.0146124
exo8 R2	0.221189	0.199711
exo8 R3	0.0060291	0.00337553			luc to 1	kit	se
luc R1	0.814753	0.753613			luc	1	0.211501
luc R2	0.184088	0.148125			exo8	0.0829612	0.030267
luc R3	0.864652	0.934446
exo8 R1	0.400198	0.477433
exo8 R2	0.390036	0.433394
exo8 R3	0.00806306	0.00574721
luc R1	0.765188	0.541244
luc R2	0.499562	0.214634
luc R3	0.110792	0.0796763
exo8 R1	0.142549	0.145002
exo8 R2	0.133812	0.126687
exo8 R3	0.00909816	0.00744326
luc R1	0.621552	0.347833
luc R2	0.436782	0.230533
luc R3	0.0950019	0.0799855
exo8 R1	0.131926	0.130988
exo8 R2	0.100963	0.0990713
exo8 R3	0.0100804	0.0058909
luc R1	0.532903	0.358647
luc R2	0.478579	0.342229
luc R3	0.0811784	0.0624693
exo8 R1	0.189786	0.15608
exo8 R2	0.116179	0.0932968
exo8 R3	0.0060436	0
avgs	c- kit mRNA	ckit mRNA se	c- kit primary	ckit primary se
luc R1	1.02993	0.237949	0.753153	0.172703
luc R2	0.534529	0.0970128	0.344855	0.0747576
luc R3	0.23089	0.127156	0.219448	0.143361
exo8 R1	0.261578	0.0536283	0.235577	0.0546435
exo8 R2	0.185808	0.0442755	0.177822	0.0534577
exo8 R3	0.00795222	0.000668219	0.00542169	0.00140986
R1 to 1	c- kit mRNA	ckit mRNA se	c- kit primary	ckit primary se
luc R1	1	0.231034	1	0.229307
luc R2	0.518995	0.0941934	0.457882	0.0992596
luc R3	0.22418	0.12346	0.291372	0.190348
exo8 R1	0.253976	0.0520698	0.312788	0.072553
exo8 R2	0.180408	0.0429887	0.236104	0.0709786
exo8 R3	0.00772111	0.000648799	0.00719866	0.00187195

## Sheet: Figure 5D
RNA analysis
	Vim normalized to 18s	gata2 normalized to 18s	Samd14 normalized to 18s	HDC normalized to 18s						Western analysis
luc R1	3.51238	7.8649	0.64326	2.91171							tubulin	gata1	gata1/tub	gata2	gata2 tub	gata2/tub
luc R2	0.286265	0.80872	0.141926	0.196809						luc	777139	552998	0.711582	1110229	769953	1.44194
luc R3	0.0274485	0.0612951	0.577581	0.0378874						exo8	761741	793319	1.04146	877425	900666	0.974196
exo8 R1	3.44943	8.2696	0.489689	4.90355						luc	787007	612153	0.777824	793830	779746	1.01806
exo8 R2	0.0700669	1.63088	0.203113	0.0735431						exo8	871194	842344	0.966885	770596	664984	1.15882
exo8 R3	0.102352	3.86749	0.29047	0.0440496						luc	844826	546668	0.647078	1441641	711209	2.02703
luc R1	2.01054	4.33046	0.357894	1.7421						exo8	638751	555373	0.869467	859173	584945	1.46881
luc R2	0.337261	0.930161	0.355574	0.222005
luc R3	0.0331269	0.0345181	0.455064	0.0255517
exo8 R1	1.64966	5.2435	0.285345	2.24191						avg	gata1	se	gata2	se
exo8 R2	0.166656	2.81432	0.551684	0.146334						luc	0.712161	0.0377444	1.49568	0.2925
exo8 R3	0.0413275	2.38611	0.311517	0.0318732						exo8	0.959269	0.0497944	1.20061	0.144304
luc R1	0.825515	2.83134	0.266371	0.935878
luc R2	0.0319513	0.0837191	0.576659	0.0302338						luc to 1	gata1	se	gata2	se
luc R3	0.35202	0.857649	0.425522	0.210496						luc	1	0.0529997	1	0.195563
exo8 R1	2.60085		0.480281							exo8	1.34698	0.0699202	0.802718	0.0964803
exo8 R2	0.569612	7.3509		0.4798
exo8 R3	0.0532152	2.73206	0.347409	0.0346507
luc R1	0.87705	3.27521	0.238045	1.065
luc R2	0.142006	0.431015	0.227619	0.141523
luc R3	0.0287499	0.0508746	0.392739	0.0460947
exo8 R1	1.06478	2.61257	0.275758	1.44459
exo8 R2	0.0588258	0.965084	0.312382	0.100385
exo8 R3	0.0299454	1.32394	0.340973	0.0239035
luc R1	0.462415	1.26889	0.257893	0.661059
luc R2	0.141058	0.280192	0.295105	0.129798
luc R3	0.0178555	0.0422203	0.431847	0.0263518
exo8 R1	0.934721	2.66767	0.319876	1.31504
exo8 R2	0.0364975	0.570398	0.218083	0.0749262
exo8 R3	0.0397361	1.06622	0.401579	0.04218
luc R1	0.703285	1.67868	0.173666	1.08759
luc R2	0.227318	0.485694	0.238496	0.220423
luc R3	0.0362837	0.0719932	0.375009	0.0502197
exo8 R1	1.21769	3.18588	0.191994	2.33226
exo8 R2	0.0500613	0.986639	0.279817	0.0795674
exo8 R3	0.0278114	1.17881	0.267633	0.0319618
avgs	vim	vim se	gata2	gata2 se	samd	sam se	HDC	HDC se
luc R1	1.39853	0.476196	3.54158	0.975095	0.322855	0.0684951	1.40056	0.335339
luc R2	0.19431	0.0454284	0.50325	0.129981	0.305897	0.0614961	0.156799	0.0299342
luc R3	0.0825807	0.0539485	0.186425	0.134355	0.44296	0.0293465	0.0661003	0.0291677
exo8 R1	1.81952	0.408683	4.39585	0.986475	0.34049	0.0488225	2.44747	0.590762
exo8 R2	0.15862	0.0843562	2.38637	1.04367	0.313016	0.0574297	0.159093	0.0651126
exo8 R3	0.0490646	0.0112856	2.09244	0.451833	0.326597	0.0193834	0.0347698	0.0030298
R1 to 1	vim	vim se	gata2	gata2 se	samd	sam se	HDC	HDC se
luc R1	1	0.340497	1	0.275328	1	0.212154	1	0.239433
luc R2	0.138939	0.032483	0.142098	0.0367014	0.947474	0.190476	0.111954	0.0213731
luc R3	0.0590482	0.0385751	0.0526389	0.0379365	1.37201	0.0908968	0.0471957	0.0208258
exo8 R1	1.30102	0.292223	1.24121	0.278541	1.05462	0.151221	1.7475	0.421805
exo8 R2	0.113419	0.0603177	0.673815	0.294691	0.969524	0.177881	0.113592	0.0464905
exo8 R3	0.035083	0.00806958	0.590821	0.12758	1.01159	0.0600374	0.0248257	0.00216328
exo8 R4	0.0801727	0.0201198	0.362295	0.0863865	0.682997	0.0935987	0.251449	0.0505892

## Sheet: Figure 5E
	exo8 normalized to 18S	kit normalized to 18S	Cdkn1b normalized to 18s	gadd45a normalized to 81S	ddit3 normalized to 18S	gas2l1 normalized to 18S	trpinp1 normalized to 18s
24h luc	0.974817	0.755769	0.757456	0.971452	1.80015	3.41564	3.53185
24h 8	0.34831	0.401988	0.839892	1.11232	1.73732	3.74723	4.46982
24h luc	0.984396	0.762029	0.759236	0.973734	1.80438	3.42366	3.79288
24h 8	0.282326	0.410902	0.729577	0.966222	1.50913	3.25506	4.8815
24h luc	1.22635	0.536675	0.84683	1.08608	2.01256	3.81866	1.48789
24h exo8	0.45316	0.389473	0.846474	1.12104	1.75093	3.7766	3.67492
24h luc	1.23364	0.588163	0.885898	1.13618	2.10541	3.99483	1.4613
24h exo8	0.556708	0.471524	0.998638	1.32256	2.06568	4.45549	3.72086
24h luc	1.9262	0.78389	0.808116	1.03642	1.92055	3.64408	3.15333
24h exo8	0.285794	0.18869	0.835454	1.10644	1.72814	3.72743	1.70844
AVGS		exosc8	exosc8 se	kit	kit se	cdkn1b	cdkn1b se	gadd45a	gadd45a se	ddit3	ddit se	gas2l1	gas2l1 se	trp53inp1	trp53inp1 se
24h	luc	1.26908	0.173568	0.685305	0.0510383	0.811507	0.024947	1.04077	0.031995	1.92861	0.0592884	3.65937	0.112495	2.68545	0.504698
	exosc8	0.385259	0.0528484	0.372515	0.048075	0.850007	0.0429657	1.12572	0.0569021	1.75824	0.0888746	3.79236	0.191694	3.69111	0.54569
AVGS to 1		exosc8	exosc8 se	kit	kit se	p27 kip1	p27 se	gadd45a	gadd45a se	ddit3	ddit se	gas2l1	gas2l1 se	trp53inp1	trp53inp1 se
	luc	1	0.136767	1	0.0744753	1	0.0307415	1	0.0307415	1	0.0307415	1	0.0307415	1	0.187938
	exosc8	0.303574	0.0416431	0.543576	0.0701512	1.04744	0.0529456	1.08161	0.0546728	0.911662	0.0460822	1.03634	0.0523845	1.37448	0.203202

## Sheet: Figure 5F
	24 h						72 h
		G1	S	G2				G1	S	G2
24h Tneg	luc	30.59	55.99	13.42		72h Tneg	luc	34.83	52.92	12.25
	luc	30.61	55.94	13.45			luc	35.19	53.4	11.41
	luc	30.36	57.88	11.76			luc	37.24	52.17	10.59
	luc	29.46	55.99	14.55			luc	34.42	53.89	11.69
	luc	29.63	60.21	10.16			luc	37.82	52.07	10.11
	luc	29.19	58.2	12.61			luc	36.35	53.13	10.52
	Avg	29.9733	57.3683	12.6583			Avg	35.975	52.93	11.095
	se	0.253649	0.703995	0.628126			se	0.56244	0.288664	0.333824
24h Tneg	exosc8	32.61	55.16	12.23		72h Tneg	exosc8	52.88	39.26	7.86
	exosc8	34.23	51.72	14.04			exosc8	51.49	37.61	10.9
	exosc8	33.39	54.13	12.48			exosc8	47.43	44.89	7.68
	exosc8	32.9	53.56	13.64			exosc8	48.37	41.13	10.5
	exosc8	33.74	52.88	13.38			exosc8	47.12	41.98	10.9
	exosc8	33.92	54.74	11.34			exosc8	49.18	41.07	9.75
	Avg	33.465	53.6983	12.8517			Avg	49.4117	40.99	9.59833
	se	0.253229	0.516736	0.413218			se	0.942802	1.0105	0.603503

## Sheet: Figure 5G
	exo8 normalized to 18S	ckit normalized to 18S
g1e luc	1.36733	1.41996
g1e exo8	0.218097	0.613274
g1e luc	1.34816	1.21218
g1e exo8	0.28455	0.693124
g1e luc	1.1514	0.870757
g1e exo8	0.305881	0.753942
g1e luc	1.21783	1.08039
g1e exo8	0.285951	1.13832
g1e luc	0.857316	0.880381
g1e exo8	0.112481	0.403281
g1e luc	1.00882	0.80427
g1e exo8	0.137434	0.514081
g1e luc	1.06896	0.816963
g1e exo8	0.220074	0.539861
g1e luc	1.05059	0.99046
g1e exo8	0.0966964	0.385993
g1e luc	0.751746	0.643023
g1e exo8	0.171584	0.409197
g1e luc	0.696205	0.68588
g1e exo8	0.182871	0.442915
g1e luc	0.691995	0.629997
g1e exo8	0.237088	0.456208
g1e luc	0.897224	0.722312
g1e exo8	0.200774	0.431909
avgs	exo8	exo8 se	c kit	ckit se
luc	1.00896	0.0681274	0.896381	0.069742
exo8	0.204457	0.0196488	0.565176	0.0623586
avg to 1	exo8	exo8 se	c kit	ckit se
luc	1	0.0675221	1	0.0778039
exo8	0.20264	0.0194742	0.630508	0.069567

## Sheet: Figure 5H
	luc		exosc8
	gpf pos	gfp neg	gpf pos	gfp neg
Kit MFI	2684	2645	1488	2750
	2606	2798	1580	2826
	2671	2853	1513	2744
	2757	2982	1558	2750
	2543	2750	1336	2537
	2428	2581	1415	2632
	2587	2764	1305	2555
	2593	2771	1382	2531
	3356	2853	1885	3267
	3381	2975	1889	3203
	3449	2946	1950	3267
	3535	3267	1908	3491
avg	2882.5	2848.75	1600.75	2879.42
se	119.617	51.9965	69.7859	96.8823
