# Supplementary material for: Exosome complex orchestrates developmental signaling to balance proliferation and differentiation during erythropoiesis
Source: eLife. 2016 Aug 20;5:e17877. doi: 10.7554/eLife.17877 (PMC5040589; doi:10.7554/eLife.17877)
Supplement: Figure 6—source data 1. — Sheet 1: Figure 6A qChIP of serine 5-phospho Pol II, and GATA-1 occupancy at Kit in control and Exosc8-knockdown Ter119- erythroid precursor cells 24 hr post-infection. Sheet 2: Figure 6B qChIP of Exosc9 occupancy at Kit and promoters of other exosome complex-regulated erythroid genes (Alas2, Hbb-b1 and Slc4a1) in erythroid precursor cells after culturing for 48 hr. DOI: http://dx.doi.org/10.7554/eLife.17877.017 [file elife-17877-fig6-data1.xlsx]

## Sheet: Figure 6A
			Kit locus																Control
			-114		Pro		0.2		5		57		58		80.8				RPII215		Keratin5 pro
			shluc	shExsoc8	shluc	shExsoc8	shluc	shExo8	shluc	shExsoc8	shluc	shExo8	shluc	shExsoc8	shluc	shExsoc8			shluc	shExsoc8	shluc	shExsoc8
		IgM	0.00699636	0.00704436	0.00537373	0.00295554	0.000841906	0.0141356	0.0017469	0.00658058	5.5543e-05	0	0.00682568	0.00473226	4.39625e-07	0.00237695		IgM	0.00425268	0.00425268	0.0120491	0.00236628
			0.00309154	0.00458651	0.00275756	0.00439299	0.0225937	0.0158831	0.0041791	0.00413451	0	0.00430072	0.00114519	0.00342848	0.00237017	0.00166713			0.00201085	0.00129829	0.00576814	0.00384263
			0.00650086	0.00171344	0.000804292	0.000436221	0.0100372	0.00330617	0.00154735	0.00465524	0.00556776	0.00781095	0.00821519	0.00348085	2.60237e-06	0.00425594			0.000457698	0.0021183	0.003385	0.00153743
			0.0026322	0.00287853	0.00350082	0.0024307	0.0163078	0.0059253	0.0026548	0.00451043	0.000839389	0.00157597	0.00338366	0.00210936	0.00470956	0.00111947			0.00656246	0.00249544	0.00651952	0.00145996
			0.00397963	0.00772249	0.00739599	0.0138003	0.00189334	0.00548199	0.00652309	0.0105991	0.000769614	0.000144186	0.00964861	0.0128667	0.000699394	0.00429164			0.013071	0.0213772	0.00695284	0.0112923
			0.00253392	0.00572826	0.00799005	0.0129278	0.00856842	0.00861419	0.0129887	0.00769706	0.00165	0.000396909	0.00713242	0.0124625	0.00373044	0.000318786			0.00613092	0.00543125	0.0120074	0.00691292
		a-p-polII	0.00503221	0.0071732	0.0287047	0.0138741	0.0303361	0.0150165	0.0295455	0.0108169	0.00785217	1.28127e-06	0.036556	0.00660609	0.0144387	0.00864389		a-p-polII	0.218012	0.218012	0.00529647	0.00273926
			0.00377265	0.00660771	0.00778568	0.00808487	0.0922018	0.0403285	0.0116251	0.00714125	0.0147924	0.0104822	0.0149837	0.00579213	0.00932546	0.00414095			0.189238	0.152804	0.00205738	0.00803384
			0.00161712	0.00439591	0.00107961	0.00024773	0.107742	0.0235831	0.0115929	0.00501868	0.0133243	0.0072131	0.0104039	0.00221331	0.00740167	0.00200459			0.0823294	0.0581287	0.00381371	0.00222779
			0.00560152	0.00810121	0.0021335	0.002552	0.0359883	0.02617	0.00949066	0.00716184	0.00317361	0.00184043	0.011085	0.00394665	0.0153943	0.00156725			0.0749251	0.103413	0.0027111	0.00133442
			0.00346291	0.00517322	0.0274397	0.00480714	0.037895	0.0182559	0.0216025	0.0134248	0.00468489	0.00257522	0.0298898	0.00861055	0.0228491	0.00857421			0.314512	0.232584	0.00580561	0.0141926
			0.00374184	0.00497521	0.017321	0.0122736	0.0908148	0.0495613	0.020483	0.0110941	0.0137635	0.00277752	0.0313464	0.025086	0.0185052	0.0114324			0.235122	0.212508	0.00584754	0.00452667
			-114		Pro		0.2		5		57		58		80.8				RPII215		Keratin5 pro
			shluc	shExsoc8	shluc	shExsoc8	shluc	shExsoc8	shluc	shExsoc8	shluc	shExsoc8	shluc	shExsoc8	shluc	shExsoc8			shluc	shExsoc8	shluc	shExsoc8
	average	IgM	0.00428909	0.0049456	0.00463707	0.0060463	0.0100404	0.00889106	0.00493999	0.00743095	0.00148038	0.00237145	0.00605846	0.00651335	0.00191877	0.00233832	average	IgM	0.00541426	0.00616219	0.00778033	0.0050854
		a-p-polII	0.00387137	0.00607108	0.0140774	0.00697324	0.0658297	0.0288192	0.0173899	0.0091096	0.00959848	0.0041483	0.0223775	0.00870912	0.0146524	0.00606055		a-p-polII	0.18569	0.162908	0.0042553	0.00550909
	SE	IgM	0.000879439	0.00104377	0.00123984	0.00233961	0.00371859	0.00224942	0.0019352	0.00134292	0.000929584	0.00138316	0.00141355	0.00215027	0.000891396	0.000730535	SE	IgM	0.00196721	0.00337972	0.00156167	0.00196718
		a-p-polII	0.000616353	0.000642136	0.00545858	0.00240512	0.015405	0.00596031	0.00346728	0.00140374	0.00223709	0.0017372	0.00511965	0.00369728	0.00254209	0.00180177		a-p-polII	0.0412392	0.0314092	0.000728485	0.00216467
	STDEV	IgM	0.00197874	0.00234849	0.00278965	0.00526412	0.00836684	0.0050612	0.0043542	0.00302156	0.00209156	0.00311211	0.00318049	0.00483811	0.00200564	0.0016437	STDEV	IgM	0.00442622	0.00760438	0.00351376	0.00442616
		a-p-polII	0.00138679	0.00144481	0.0122818	0.00541153	0.0346613	0.0134107	0.00780138	0.00315842	0.00503344	0.00390869	0.0115192	0.00831888	0.00571971	0.00405399		a-p-polII	0.0927883	0.0706708	0.00163909	0.0048705
			Kit locus
			-114		Pro		0.2		5		57		58		80.8
			shluc	shExsoc8	shluc	shExsoc8	shluc	shExo8	shluc	shExsoc8	shluc	shExo8	shluc	shExsoc8	shluc	shExsoc8
		PI	0.0056285	0.00775012	0.00317417	0.00690977	0.00293296	0.0141356	0.0025562	0.00534137	0	0.000833275	0.00349292	0.00398051	0.00182942	0.00332508
			0.00257463	0.00285874	2.47213e-05	0.00247181	0.023023	0.0110419	0.00292544	0.000854066	0.00259252	0.00422117	0.00362027	0.00212097	0.00210689	0.00201019
			0.000789508	0.002166	0.000223113	0.000166638	0.00860042	0.00552553	1.59023e-06	1.1261e-05	0.00448302	0.000982163	0	0.000689415	2.82707e-06	3.7419e-07
			0.00100175	0.000168805	0.00052195	0.00217525	0.00450672	0.0179366	0.00380452	0.00309755	0	0.00175305	0.00500977	0.000990336	0.00355063	0.00107794
			0.0063007	0.0198165	0.00127817	0.00656558	0.00185713	0.0044199	0.00177708	0.00641549	0.001104	0.00105007	0.00710267	0.00902834	0.00193845	0.00358671
			0.00611113	0.0132237	0.00702868	0.00465662	0.00702068	0.0175393	0.0111935	0.00595748	0.00121935	0.00015139	0.00885774	0.00875529	0.000186528	0.00262818
		a-G1	0.148789	0.117902	0.0280595	0.0130052	0.0313713	0.0206208	0.105427	0.0677196	0.0217619	0.00787253	0.0491475	0.0288363	0.00554432	0.00645431
			0.130964	0.147503	0.000295857	0.0103748	0.0614417	0.0436349	0.119867	0.0813189	0.0109448	0.0168463	0.0340379	0.0263983	0.00194003	0.00735401
			0.111349	0.0953174	0.00156285	0.000133117	0.0702466	0.0255708	0.0703573	0.0564528	0.0155358	0.0228632	0.018741	0.0212318	1.06648e-06	1.75654e-05
			0.134901	0.113625	0.00300483	0.00825289	0.0303626	0.0271705	0.0764318	0.058071	0.00835702	0.00175933	0.0327287	0.02953	0.0152021	0.00375908
			0.253609	0.256154	0.0301288	0.0393578	0.0117802	0.0159706	0.15379	0.108739	0.00461561	0.00743073	0.062063	0.0311377	0.00591301	0.00319847
			0.218855	0.180331	0.0358948	0.0181299	0.036489	0.0343695	0.179263	0.122211	0.00779544	0.0163279	0.0516036	0.0381647	0.0131677	0.00327891
			-114		Pro		0.2		5		57		58		80.8
			shluc	shExsoc8	shluc	shExsoc8	shluc	shExsoc8	shluc	shExsoc8	shluc	shExsoc8	shluc	shExsoc8	shluc	shExsoc8
	average	PI	0.00373437	0.00766398	0.0020418	0.00382428	0.00799015	0.0117665	0.00370972	0.00361287	0.00156648	0.00149852	0.00468056	0.00426081	0.00160246	0.00210475
		a-G1	0.166411	0.151805	0.0164911	0.0148756	0.0402819	0.0278895	0.117523	0.0824187	0.0115018	0.0121833	0.0413869	0.0292165	0.00696136	0.00401039
		PI	0.0011471	0.00337367	0.00119951	0.00118683	0.00345767	0.002595	0.00172645	0.00121208	0.000764678	0.000634876	0.00137514	0.00167524	0.000588882	0.000611045
		a-G1	0.0250988	0.0263079	0.00733895	0.00594602	0.00963563	0.00440289	0.0190562	0.0121886	0.00276057	0.00345874	0.00698193	0.00248016	0.00269022	0.00116496
	STDEV	PI	0.00258098	0.00759075	0.00269891	0.00267038	0.00777975	0.00583876	0.00388451	0.00272719	0.00172053	0.00142847	0.00309406	0.0037693	0.00132498	0.00137485
		a-G1	0.0564722	0.0591928	0.0165126	0.0133785	0.0216802	0.0099065	0.0428765	0.0274244	0.00621127	0.00778217	0.0157094	0.00558035	0.00605301	0.00262117

## Sheet: Figure 6B
			rep1 tech1	rep1 tech2	rep2 tech1	rep2 tech2	rep3 tech1	rep3 tech2				average	SE	STDEV
Kit locus	Kit pro	cont IgG	0.00143349	0.00100465	0.000967842	0.0014458	0.00212944	8.3221e-05		Kit pro	cont IgG	0.00117741	0.000302418	0.00068044
		aExsoc9	0.00690667	0.00686735	0.0126926	0.0164221	0.0151992	0.0254543			aExsoc9	0.0139237	0.00308798	0.00694796
			rep1 tech1	rep1 tech2	rep2 tech1	rep2 tech2	rep3 tech1	rep3 tech2
	Kit+35	cont IgG	0.00092006	0.00449315	0.00322132	0.00180034	2.5004e-06	0.000162068		Kit+35	cont IgG	0.00176657	0.000797463	0.00178632
		aExsoc9	0.00604171	0.0140054	0.00977438	0.00478448	0.0236324	0.0243271			aExsoc9	0.0137609	0.00381536	0.00854641
			rep1 tech1	rep1 tech2	rep2 tech1	rep2 tech2	rep3 tech1	rep3 tech2
	Kit+58	cont IgG	0.00206139	0.00211474	0.00792778	0.00480624	0.00392778	0.00858512		Kit+58	cont IgG	0.00490384	0.00125504	0.00281129
		aExsoc9	0.00455543	0.00974238	0.0402251	0.0102412	0.0137285	0.0173281			aExsoc9	0.0159701	0.00563659	0.012626
			rep1 tech1	rep1 tech2	rep2 tech1	rep2 tech2	rep3 tech1	rep3 tech2
	Kit+75	cont IgG	0.000836184	0.00285348	0.00248291	0.00850249	0.00479833	0.00291534		Kit+75	cont IgG	0.00373146	0.00118584	0.00265629
		aExsoc9	0.00391875	0.00714028	0.0103512	0.0190626	0.0220712	0.0156787			aExsoc9	0.0130371	0.00315692	0.00707149
			rep1 tech1	rep1 tech2	rep2 tech1	rep2 tech2	rep3 tech1	rep3 tech2
	Kit+80.5	cont IgG	0.000418041	0.000714442	0.000342511	0.0016	0.00118169	0.0139521		Kit+80.5	cont IgG	0.00303481	0.00239713	0.00536956
		aExsoc9	0.00290811	0.00347576	0.0112502	0.00547494	0.0138732	0.00429458			aExsoc9	0.00687947	0.00203629	0.00456129
			rep1 tech1	rep1 tech2	rep2 tech1	rep2 tech2	rep3 tech1	rep3 tech2
	Kit+80.8	cont IgG	0.000997432	0.000392045	0.00092342	0.00515775	0.00103621	0		Kit+80.8	cont IgG	0.00141781	0.000837962	0.00187703
		aExsoc9	0.0023554	0.00314859	0.00823618	0.00714289	0.00624802	0.0144241			aExsoc9	0.00692586	0.00193158	0.00432675
control
			rep1 tech1	rep1 tech2	rep2 tech1	rep2 tech2	rep3 tech1	rep3 tech2				average	SE	STDEV
	slc4a1 -0.2	cont IgG	0.00306982	0.00513044	0.00411957	0.00876379	0.00245956	0		slc4a1 -0.2	cont IgG	0.00392386	0.00169886	0.00293902
		aExsoc9	0.0144874	0.015832	0.022601	0.026876	0.0236988	0.0200977			aExsoc9	0.0205988	0.00275213	0.00476118
			rep1 tech1	rep1 tech2	rep2 tech1	rep2 tech2	rep3 tech1	rep3 tech2
	b major pro	cont IgG	0.000718242	0.00228489	0.00257318	0.00560398	0.00169563	0.00203451		b major pro	cont IgG	0.00248507	0.000957632	0.0016567
		aExsoc9	0.0064304	0.0142716	0.0155094	0.0231978	0.0177777	0.0180336			aExsoc9	0.0158701	0.00320596	0.00554631
			rep1 tech1	rep1 tech2	rep2 tech1	rep2 tech2	rep3 tech1	rep3 tech2
	ALAS2 pro	cont IgG	0.00356231	0.00124565	0.00547277	0.00584436	0.00323798	0.000878852		ALAS2 pro	cont IgG	0.00337365	0.000921789	0.00206481
		aExsoc9	0.00995613	0.0114118	0.0223222	0.0196063	0.0120154	0.0120154			aExsoc9	0.0145545	0.00227436	0.00509458
			rep1 tech1	rep1 tech2	rep2 tech1	rep2 tech2	rep3 tech1	rep3 tech2
	Myod 5'upstream	cont IgG	0.00517786	0.00198568	0.00349187	0.0072893	0.000283015	0.00241875		Myod 5'upstream	cont IgG	0.00344108	0.00111096	0.00248855
		aExsoc9	0.0034904	0.00176587	0.00786507	0.0113896	0.0105772	0.00783135			aExsoc9	0.00715324	0.0017067	0.003823
			rep1 tech1	rep1 tech2	rep2 tech1	rep2 tech2	rep3 tech1	rep3 tech2
	MyoD	cont IgG	0.00172569	0.000602233	0.00486563	0.00347288	0.00414638	0.00523128		MyoD pro	cont IgG	0.00334068	0.000811613	0.00182613
		aExsoc9	0.00441814	0.00409089	0.0116273	0.00992278	0.0134872	0.0118732			aExsoc9	0.0092366	0.00178777	0.00402248
