# Supplementary material for: Exosome complex orchestrates developmental signaling to balance proliferation and differentiation during erythropoiesis
Source: eLife. 2016 Aug 20;5:e17877. doi: 10.7554/eLife.17877 (PMC5040589; doi:10.7554/eLife.17877)
Supplement: Figure 7—source data 1. — Sheet 1 2 and 3: Figure 7B Kit MFI and percentage of erythroid precursor cells in the R1, R2, R3 R4 and R5 populations 24, 48 and 72 hr post Exosc8 knockdown and/or Kit overexpression. Sheet 4: Figure 7C Kit MFI and percentage of erythroid precursor cells in the R1, R2, R3, R4 and R5 population 48 hr post-Exosc8 knockdown in cells infected with increasing amounts of a Kit-expressing retrovirus. DOI: http://dx.doi.org/10.7554/eLife.17877.019 [file elife-17877-fig7-data1.xlsx]

## Sheet: Figure 7B 24h
	other	R1	R2	R3	R4	R5	Kit MFI in GFP pos
luc emp	0.77	10	51.4	37.4	0.383	0.0271	2416
	0.826	12.1	58.7	28	0.309	0.0302	2488
	0.652	10.9	57.5	30.6	0.351	0.0145	2108
	1.11	11.7	51.3	35.5	0.371	0.0412	2256
avg	0.8395	11.175	54.725	32.875	0.3535	0.02825	2317
se	0.097185	0.464354	1.964	2.16617	0.0162352	0.00549158	84.8744
luc kit	0.587	7.65	66.8	24.7	0.274	0.00645	14873
	0.776	10.2	71.3	17.4	0.308	0.00636	16118
	0.854	9.29	67.4	22.2	0.25	0.00675	14724
	0.622	8.51	72.8	17.8	0.24	0.00338	20992
avg	0.70975	8.9125	69.575	20.525	0.268	0.005735	16676.8
se	0.0632223	0.544371	1.4665	1.76606	0.0151217	0.000789414	1471.97
exo8 emp	0.83	14.6	38.1	45.1	1.28	0.0463	775
	0.974	15.6	46.1	36.6	0.659	0.0304	829
	0.95	15.3	43.2	39.9	0.608	0.0201	728
	0.653	15.6	45	37.7	0.973	0.0231	699
avg	0.85175	15.275	43.1	39.825	0.88	0.029975	757.75
se	0.0733557	0.23585	1.77059	1.8874	0.155851	0.00585568	28.447
exo8 and kit	1.34	11.6	52.6	33.7	0.796	0.0158	16200
	1.86	13.5	60	24.2	0.416	0.047	15367
	1.59	12.5	52.5	32.3	1.18	0.0409	13316
	1.39	12.3	58	27.7	0.573	0.00629	14835
avg	1.545	12.475	55.775	29.475	0.74125	0.0274975	14929.5
se	0.118075	0.392375	1.90629	2.17577	0.165729	0.00977481	606.76
avgs	other	R1	R2	R3	R4	R5	Kit MFI in GFP pos
luc and empty	0.8395	11.175	54.725	32.875	0.3535	0.02825	2317
luc and kit	0.70975	8.9125	69.575	20.525	0.268	0.005735	16676.8
exo8 and empty	0.85175	15.275	43.1	39.825	0.88	0.029975	757.75
exo8 and kit	1.545	12.475	55.775	29.475	0.74125	0.0274975	14929.5
se	other	R1	R2	R3	R4	R5	Kit MFI in GFP pos
luc and empty	0.097185	0.464354	1.964	2.16617	0.0162352	0.00549158	84.8744
luc and kit	0.0632223	0.544371	1.4665	1.76606	0.0151217	0.000789414	1471.97
exo8 and empty	0.0733557	0.23585	1.77059	1.8874	0.155851	0.00585568	28.447
exo8 and kit	0.118075	0.392375	1.90629	2.17577	0.165729	0.00977481	606.76

## Sheet: Figure 7B 48h
	other	R1	R2	R3	R4	R5	Kit MFI in GFP pos
luc emp	1.38	18.3	44	34.3	2.1	0.0256	1289
	1.17	15.6	48.7	33.5	0.982	0.0147	1076
	1.44	17.3	46.9	33	1.38	0.0114	1064
	1.64	17.6	41.8	37	1.92	0.0336	752
avg	1.4075	17.2	45.35	34.45	1.5955	0.021325	1045.25
se	0.0967277	0.573004	1.52889	0.89116	0.255383	0.00509368	110.569
luc kit	2.36	20.2	64.8	12.1	0.535	0.00377	9304
	2.21	20.2	67.5	9.76	0.312	0	11032
	2.38	20	68.5	8.55	0.532	0	14985
	2.31	20.9	64	12.2	0.637	0	9660
avg	2.315	20.325	66.2	10.6525	0.504	0.0009425	11245.2
se	0.0379693	0.197379	1.0716	0.899401	0.0684945	0.0009425	1301.05
exo8 emp	1.99	10.6	17	62.5	7.89	0.0533	178
	2.13	7.94	21.5	64.1	4.19	0.097	190
	2.23	8.82	19.9	64.1	4.84	0.0534	176
	1.85	8.61	24.9	61	3.49	0.0821	212
avg	2.05	8.9925	20.825	62.925	5.1025	0.07145	189
se	0.0828654	0.567735	1.6469	0.744284	0.969187	0.0108837	8.2664
exo8 and kit	6.45	26.5	36.7	28.5	1.76	0.066	2404
	6.66	21.5	45.6	25.3	0.962	0.0502	2149
	6.37	26	38.5	27.6	1.48	0.0735	2047
	4.84	22.8	46.6	24.6	1.16	0.0157	2267
avg	6.08	24.2	41.85	26.5	1.3405	0.05135	2216.75
se	0.417832	1.21724	2.48948	0.924662	0.175898	0.0128371	76.9159
avgs	other	R1	R2	R3	R4	R5	Kit MFI in GFP pos
luc and empty	1.4075	17.2	45.35	34.45	1.5955	0.021325	1045.25
luc and kit	2.315	20.325	66.2	10.6525	0.504	0.0009425	11245.2
exo8 and empty	2.05	8.9925	20.825	62.925	5.1025	0.07145	189
exo8 and kit	6.08	24.2	41.85	26.5	1.3405	0.05135	2216.75
se	other	R1	R2	R3	R4	R5	Kit MFI in GFP pos
luc and empty	0.0967277	0.573004	1.52889	0.89116	0.255383	0.00509368	110.569
luc and kit	0.0379693	0.197379	1.0716	0.899401	0.0684945	0.0009425	1301.05
exo8 and empty	0.0828654	0.567735	1.6469	0.744284	0.969187	0.0108837	8.2664
exo8 and kit	0.417832	1.21724	2.48948	0.924662	0.175898	0.0128371	76.9159

## Sheet: Figure 7B 72h
	other	R1	R2	R3	R4	R5	Kit MFI in GFP pos
luc emp	0.891	11.1	44.5	40.6	2.84	0.0968	687
	0.819	8.2	50.6	38.6	1.7	0.0466	645
	1.12	8.21	47.3	41.5	1.72	0.0765	598
	1.13	9.34	45.5	42	2.05	0.0426	588
avg	0.99	9.2125	46.975	40.675	2.0775	0.065625	629.5
se	0.0793421	0.683683	1.34001	0.749861	0.266533	0.0128525	22.8418
luc kit	2.11	17.7	67.4	11.8	0.995	0.0314	7674
	2.86	20.1	66.7	9.53	0.816	0.00691	9684
	1.92	17.1	72.1	8.26	0.574	0.0172	11716
	2.74	19.2	64.9	12.2	0.968	0.0146	8438
avg	2.4075	18.525	67.775	10.4475	0.83825	0.0175275	9378
se	0.231206	0.686021	1.5348	0.936637	0.0964921	0.00511416	882.567
exo8 emp	1.97	5.57	15.5	57.4	18.6	0.965	139
	2.54	5.55	15.8	58.7	16.6	0.817	145
	2.92	6.41	15.5	54.8	19.4	0.963	137
	1.81	5.98	20.1	54.6	16.7	0.789	142
avg	2.31	5.8775	16.725	56.375	17.825	0.8835	140.75
se	0.256677	0.20328	1.12722	1.00364	0.698063	0.0468286	1.75
exo8 and kit	5.31	24.8	34.6	25.8	8.82	0.635	808
	4.52	21.8	39.1	28.5	5.66	0.418	792
	4.99	21.5	36.6	28.7	7.71	0.399	820
	2.72	18.8	41.6	30	6.49	0.401	863
avg	4.385	21.725	37.975	28.25	7.17	0.46325	820.75
se	0.578223	1.22704	1.51898	0.88176	0.692616	0.0574084	15.2062
avgs	other	R1	R2	R3	R4	R5	Kit MFI in GFP pos
luc and empty	0.99	9.2125	46.975	40.675	2.0775	0.065625	629.5
luc and kit	2.4075	18.525	67.775	10.4475	0.83825	0.0175275	9378
exo8 and empty	2.31	5.8775	16.725	56.375	17.825	0.8835	140.75
exo8 and kit	4.385	21.725	37.975	28.25	7.17	0.46325	820.75
se	other	R1	R2	R3	R4	R5	Kit MFI in GFP pos
luc and empty	0.0793421	0.683683	1.34001	0.749861	0.266533	0.0128525	22.8418
luc and kit	0.231206	0.686021	1.5348	0.936637	0.0964921	0.00511416	882.567
exo8 and empty	0.256677	0.20328	1.12722	1.00364	0.698063	0.0468286	1.75
exo8 and kit	0.578223	1.22704	1.51898	0.88176	0.692616	0.0574084	15.2062

## Sheet: Figure 7C
	other	R1	R2	R3	R4	R5	Kit MFI in GFP pos
luc emp	2.52	21.7	57.4	18.1	0.366	0.00356	2149
	1.92	18.5	58.1	21.2	0.285	0	2329
	2.36	21.2	56.4	19.8	0.294	0	1969
avg	2.26667	20.4667	57.3	19.7	0.315	0.00118667	2149
se	0.179382	0.99387	0.493288	0.896289	0.025632	0.00118667	103.923
luc kit 10	1.46	22.8	65.8	9.51	0.382	0.0136	3668
	0.951	18.3	68.3	12.1	0.296	0.00356	3797
	1.1	20.8	66.7	10.9	0.431	0.0104	3677
avg	1.17033	20.6333	66.9333	10.8367	0.369667	0.00918667	3714
se	0.151085	1.30171	0.731057	0.748339	0.039456	0.00296111	41.5812
luc and kit 25	1.63	22.4	68.7	6.83	0.444	0.00352	5049
	1.15	18.5	71.7	8.38	0.26	0.0107	5176
	1.34	22.4	68.2	7.52	0.561	0	4698
avg	1.37333	21.1	69.5333	7.57667	0.421667	0.00474	4974.33
se	0.139563	1.3	1.09291	0.448343	0.0876058	0.00314848	142.948
luc and kit 50	2.05	24.9	67.3	5.33	0.429	0.00341	5979
	1.67	21.2	70.2	6.69	0.228	0.0107	6639
	1.79	24.5	67.3	6.08	0.333	0.00347	5703
avg	1.83667	23.5333	68.2667	6.03333	0.33	0.00586	6107
se	0.112151	1.17237	0.966667	0.393291	0.0580431	0.00242006	277.676
exo8 emp	3.66	20.8	37.7	37.2	0.576	0	364
	2.82	19.2	33.8	43.7	0.52	0	292
	3.1	19.7	37.4	39.2	0.618	0.00694	414
avg	3.19333	19.9	36.3	40.0333	0.571333	0.00231333	356.667
se	0.246937	0.472582	1.253	1.92209	0.0283862	0.00231333	35.4087
exo8 and kit 10	3.27	25	42	29.2	0.638	0.00709	808
	2.24	20.1	38.3	38.6	0.769	0.0142	702
	4.02	26.4	39	29.8	0.862	0.0106	758
avg	3.17667	23.8333	39.7667	32.5333	0.756333	0.01063	756
se	0.515957	1.90992	1.1348	3.03827	0.0649726	0.00205253	30.6159
exo8 and kit 25	4.43	29.4	45.4	20.1	0.684	0.0107	1732
	3.88	26.7	44.4	24.4	0.717	0.00717	1707
	3.01	25.2	44.1	27.1	0.588	0.00704	1513
avg	3.77333	27.1	44.6333	23.8667	0.663	0.00830333	1650.67
se	0.413374	1.22882	0.392994	2.03825	0.0386911	0.00119892	69.2106
exo8 and kit 50	7.89	35.1	42.9	13.5	0.595	0.00356	2690
	4.31	28.2	47.1	19.9	0.545	0.0107	2664
	7.07	33.5	42.5	16.1	0.837	0.007	2278
avg	6.42333	32.2667	44.1667	16.5	0.659	0.00708667	2544
se	1.08286	2.08513	1.47121	1.85831	0.0901628	0.0020616	133.212
avgs	other	R1	R2	R3	R4	R5	Kit MFI in GFP pos
emp	2.26667	20.4667	57.3	19.7	0.315	0.00118667	2149
kit 10	1.17033	20.6333	66.9333	10.8367	0.369667	0.00918667	3714
kit 25	1.37333	21.1	69.5333	7.57667	0.421667	0.00474	4974.33
kit 50	1.83667	23.5333	68.2667	6.03333	0.33	0.00586	6107
exo8 emp	3.19333	19.9	36.3	40.0333	0.571333	0.00231333	356.667
exo8 and kit 10	3.17667	23.8333	39.7667	32.5333	0.756333	0.01063	756
exo8 and kit 25	3.77333	27.1	44.6333	23.8667	0.663	0.00830333	1650.67
exo8 and kit 50	6.42333	32.2667	44.1667	16.5	0.659	0.00708667	2544
se	other	R1	R2	R3	R4	R5	Kit MFI in GFP pos
luc emp	0.179382	0.99387	0.493288	0.896289	0.025632	0.00118667	103.923
luc kit 10	0.151085	1.30171	0.731057	0.748339	0.039456	0.00296111	41.5812
luc and kit 25	0.139563	1.3	1.09291	0.448343	0.0876058	0.00314848	142.948
luc and kit 50	0.112151	1.17237	0.966667	0.393291	0.0580431	0.00242006	277.676
exo8 emp	0.246937	0.472582	1.253	1.92209	0.0283862	0.00231333	35.4087
exo8 and kit 10	0.515957	1.90992	1.1348	3.03827	0.0649726	0.00205253	30.6159
exo8 and kit 25	0.413374	1.22882	0.392994	2.03825	0.0386911	0.00119892	69.2106
exo8 and kit 50	1.08286	2.08513	1.47121	1.85831	0.0901628	0.0020616	133.212
